# Supplementary material
Source: publisher figshare collection journal article supplement (https://acs.figshare.com/ndownloader/files/5123731)
Supplement: Supplementary file 1 [file 5123731]

#===============================================================================
data_hydsnse
#===============================================================================

_publ_requested_journal          Inorg.Chem.
_publ_contact_author_name        'Dr. David B. Mitzi'
_publ_contact_author_address     
;IBM T. J. Watson Research Center
P.O. Box 218
Yorktown Heights, NY  10598
;
_publ_contact_author_email       dmitzi@us.ibm.com
_publ_contact_author_phone       914-945-4176
_publ_contact_author_fax         914-945-2141
loop_
_publ_author_name
_publ_author_address
'Mitzi, David'
;IBM T. J. Watson Research Center
P.O. Box 218
Yorktown Heights, NY  10598
;

# 5. CHEMICAL DATA

_chemical_name_systematic        "'hydrazinium/hydrazine tin(IV) selenide'"
_chemical_name_common            'hydrazinium/hydrazine tin(IV) selenide'
_chemical_formula_moiety         'N14 H32 Sn2 Se6'
_chemical_formula_structural     ?
_chemical_formula_analytical     ?
_chemical_formula_sum            'N14 H32 Sn2 Se6'
_chemical_formula_weight         939.53

loop_
_atom_type_symbol
_atom_type_description
_atom_type_scat_dispersion_real
_atom_type_scat_dispersion_imag
_atom_type_scat_source
N N 0.006 0.003 'International Tables Vol. IV Table 2.2B'
H H 0.000 0.000 'International Tables Vol. IV Table 2.2B'
Sn Sn -0.654 1.425 'International Tables Vol. IV Table 2.2B'
Se Se -0.093 2.226 'International Tables Vol. IV Table 2.2B'

#===============================================================================

# 6. CRYSTAL DATA

_symmetry_cell_setting           triclinic
_symmetry_space_group_name_H-M   'P -1'
_symmetry_int_tables_number      2

loop_
_symmetry_equiv_pos_as_xyz

x,y,z
-x,-y,-z
_cell_length_a                   6.6475(6)
_cell_length_b                   9.5474(9)
_cell_length_c                   9.883(1)
_cell_angle_alpha                94.110(2)
_cell_angle_beta                 99.429(2)
_cell_angle_gamma                104.141(2)
_cell_volume                     595.9(1)
_cell_formula_units_Z            1
_cell_measurement_temperature    293
_cell_measurement_reflns_used    3504
_cell_measurement_theta_min      ?
_cell_measurement_theta_max      ?
_cell_special_details            
;
 ?  #Insert any comments here.
;
_exptl_crystal_description       block
_exptl_crystal_colour            'pale yellow'
_exptl_crystal_size_max          0.46
_exptl_crystal_size_mid          0.12
_exptl_crystal_size_min          0.11
_exptl_crystal_size_rad          ?
_exptl_crystal_density_meas      ?
_exptl_crystal_density_diffrn    2.618
_exptl_crystal_density_method    'not measured'
_exptl_crystal_F_000             432.70
_exptl_absorpt_coefficient_mu    11.28
_exptl_absorpt_correction_type   empirical
_exptl_absorpt_process_details   SADABS
_exptl_absorpt_correction_T_min  ?
_exptl_absorpt_correction_T_max  ?

#===============================================================================

# 7. EXPERIMENTAL DATA

_exptl_special_details           
;
A pale yellow block-like crystal of 
(N2H4)3(N2H5)4Sn2Se6 (2), with the approximate dimensions 
0.11 mm x 0.12 mm x 0.46 mm, was 
selected under a microscope and attached to the end of a quartz fiber 
with 5 minute epoxy. Intensity data were collected with a Bruker 
SMART CCD diffractometer equipped with a fine focus 2.4 kW 
sealed tube X-ray source (MoKa radiation) and a detector distance 
of approximately 5.0 cm. The data were collected in 2272 frames 
with increasing omega and an exposure time of 6 sec per frame. 
For 2, a short collection time was employed to avoid hydrazine loss from 
the sample during data collection. The increment in omega between 
each frame was 0.3 deg. 

Final cell parameters and crystal orientation matrix were obtained by a 
least-squares fit of 3504 reflections. An empirical absorption 
correction based on equivalent reflections was applied to the intensity data. 
The structure was solved and refined using the NRCVAX 386 PC version 
program.  First, the Sn and Se atoms were located using direct methods. 
The N atoms were then located using successive Fourier difference maps.
All heavy atoms (Sn, Se, N) were refined anisotropically.  Hydrogen 
atoms were located from difference maps and fully refined using isotropic 
thermal parameters.  The minimum and maximum peaks in the final difference 
Fourier map correspond to -0.6 and 0.6 e/A3.  
No additional symmetry was detected for the refined structures using the 
MISSYM program.
;

_diffrn_ambient_temperature      293
_diffrn_radiation_probe          x-ray
_diffrn_radiation_type           'Molybdenum K\a'
_diffrn_radiation_wavelength     0.70930
_diffrn_source                   'xray tube'
_diffrn_source_type              'Bruker SMART 1000'

_diffrn_radiation_monochromator  graphite
_diffrn_measurement_device       'SMART 1000'
_diffrn_measurement_method       CCD
_diffrn_standards_number         ?
_diffrn_standards_interval_count ?
_diffrn_standards_interval_time  ?
_diffrn_standards_decay_%        ?
loop_
_diffrn_standard_refln_index_h
_diffrn_standard_refln_index_k
_diffrn_standard_refln_index_l
? ? ?

_diffrn_reflns_number            6514
_diffrn_reflns_av_R_equivalents  0.010
_diffrn_reflns_av_sigmaI/netI    ?
_diffrn_reflns_limit_h_min       -8
_diffrn_reflns_limit_h_max       8
_diffrn_reflns_limit_k_min       0
_diffrn_reflns_limit_k_max       12
_diffrn_reflns_limit_l_min       -12
_diffrn_reflns_limit_l_max       12
_diffrn_reflns_theta_min         0.00
_diffrn_reflns_theta_max         27.46

_reflns_number_total             2723
_reflns_number_observed          2342
_reflns_observed_criterion       'Inet > 2.5\s(Inet)'

_computing_data_collection       ?
_computing_cell_refinement       ?
_computing_data_reduction        'NRCVAX DATRD2'
_computing_structure_solution    'NRCVAX SOLVER'
_computing_structure_refinement  'NRCVAX LSTSQ'
_computing_molecular_graphics    NRCVAX
_computing_publication_material  'NRCVAX TABLES Jan 94 Version'

#===============================================================================

# 8. REFINEMENT DATA

_refine_special_details          
;
 ? 
;

_refine_ls_structure_factor_coef F
_refine_ls_matrix_type           full
_refine_ls_weighting_scheme      calc
_refine_ls_weighting_details     'calc w=1/(\s^2^(F)+0.0003F^2^)'
_refine_ls_hydrogen_treatment    ?
_refine_ls_extinction_method     Larson
_refine_ls_extinction_coef       173(56)
_refine_ls_number_reflns         2342
_refine_ls_number_parameters     165
_refine_ls_R_factor_all          0.023
_refine_ls_R_factor_obs          0.023
_refine_ls_wR_factor_all         0.028
_refine_ls_wR_factor_obs         0.028
_refine_ls_goodness_of_fit_all   ?
_refine_ls_goodness_of_fit_obs   1.15
_refine_ls_restrained_S_all      ?
_refine_ls_restrained_S_obs      ?
_refine_ls_shift/esd_max         0.000
_refine_ls_shift/esd_mean        ?
_refine_diff_density_max         0.58
_refine_diff_density_min         -0.60

#===============================================================================

# 9. ATOMIC COORDINATES AND THERMAL PARAMETERS

loop_
_atom_site_label
_atom_site_fract_x
_atom_site_fract_y
_atom_site_fract_z
_atom_site_U_iso_or_equiv
_atom_site_thermal_displace_type
_atom_site_calc_flag
_atom_site_refinement_flags
_atom_site_type_symbol
Sn1 0.30370(3) 0.38498(2) 0.37392(2) 0.0209(1) Uani . . Sn
Se1 0.12852(6) 0.13609(4) 0.41146(4) 0.0281(2) Uani . . Se
Se2 0.71084(5) 0.42867(4) 0.42639(4) 0.0268(2) Uani . . Se
Se3 0.18900(7) 0.46138(4) 0.14742(4) 0.0329(2) Uani . . Se
N1 0.2694(6) 0.8114(5) 0.8826(4) 0.0424(22) Uani . . N
N3 0.5585(6) 0.0286(4) 0.3177(4) 0.0410(22) Uani . . N
N5 0.0295(7) 0.7366(4) 0.3068(4) 0.0396(22) Uani . . N
N2 0.4189(7) 0.7489(5) 0.9617(5) 0.0465(24) Uani . . N
N4 0.4578(7) -0.1247(5) 0.2888(5) 0.0472(25) Uani . . N
N7 0.1130(6) 0.0132(5) 0.0270(5) 0.0479(23) Uani . . N
N6 -0.1343(9) 0.7272(5) 0.1910(5) 0.055(3) Uani . . N
HN4b 0.486(8) -0.166(6) 0.214(6) 0.056(16) Uiso . . H
HN7a 0.135(11) 0.041(8) 0.118(8) 0.10(3) Uiso . . H
HN4a 0.504(8) -0.162(5) 0.348(5) 0.038(15) Uiso . . H
HN1a 0.229(8) 0.884(6) 0.939(6) 0.060(16) Uiso . . H
HN5a 0.162(8) 0.793(5) 0.298(5) 0.057(16) Uiso . . H
HN5b -0.001(10) 0.782(6) 0.380(6) 0.077(19) Uiso . . H
HN3a 0.684(8) 0.054(5) 0.369(5) 0.043(13) Uiso . . H
HN3b 0.451(7) 0.059(5) 0.368(4) 0.043(13) Uiso . . H
HN6a -0.107(10) 0.680(7) 0.125(7) 0.080(22) Uiso . . H
HN1b 0.162(7) 0.740(5) 0.836(4) 0.034(12) Uiso . . H
HN2a 0.470(9) 0.706(6) 0.911(6) 0.061(19) Uiso . . H
HN1c 0.326(10) 0.862(7) 0.814(7) 0.085(21) Uiso . . H
HN7b 0.167(12) 0.118(8) -0.001(8) 0.12(3) Uiso . . H
HN5c 0.069(9) 0.653(7) 0.307(6) 0.074(19) Uiso . . H
HN2b 0.340(10) 0.699(7) 1.006(7) 0.077(21) Uiso . . H
HN6b -0.252(10) 0.664(7) 0.202(7) 0.080(23) Uiso . . H

loop_
_atom_site_aniso_label
_atom_site_aniso_U_11
_atom_site_aniso_U_22
_atom_site_aniso_U_33
_atom_site_aniso_U_12
_atom_site_aniso_U_13
_atom_site_aniso_U_23
Sn 0.0210(1) 0.0208(1) 0.0194(1) 0.0037(1) 0.0026(1) 0.0014(1)
Se1 0.0269(2) 0.0212(2) 0.0355(2) 0.0037(1) 0.0073(2) 0.0039(2)
Se2 0.02111(18) 0.03018(20) 0.02798(21) 0.00638(14) 0.00507(15) -0.00459(15)
Se3 0.04371(24) 0.03425(22) 0.02108(20) 0.01107(17) 0.00411(17) 0.00660(15)
N1 0.0343(20) 0.0458(24) 0.0411(23) 0.0027(18) 0.0049(18) -0.0035(19)
N3 0.0300(19) 0.0536(24) 0.0374(22) 0.0107(17) 0.0024(17) 0.0014(17)
N5 0.0523(25) 0.0350(21) 0.0358(22) 0.0168(18) 0.0117(18) 0.0050(17)
N2 0.0464(24) 0.0490(25) 0.044(3) 0.0105(20) 0.0124(20) 0.0034(20)
N4 0.055(3) 0.052(3) 0.039(3) 0.0270(20) 0.0041(21) 0.0036(20)
N7 0.0454(23) 0.0439(23) 0.051(3) 0.0133(18) 0.0010(19) -0.0009(20)
N6 0.073(3) 0.058(3) 0.039(3) 0.028(3) 0.0032(23) 0.0068(21)

#===============================================================================

# 10. MOLECULAR GEOMETRY

loop_
_geom_bond_atom_site_label_1
_geom_bond_atom_site_label_2
_geom_bond_distance
Sn1 Sn1a 3.4827(5)
Sn1 Se1 2.4609(5)
Sn1 Se2 2.5933(5)
Sn1 Se2a 2.5909(4)
Sn1 Se3 2.4639(5)
Se2 Sn1a 2.5909(4)
N1 N2 1.434(6)
N1 HN1a 0.97(6)
N1 HN1b 0.89(5)
N1 HN1c 0.93(7)
N3 N4 1.439(6)
N3 HN4a 1.82(5)
N3 HN3a 0.87(5)
N3 HN3b 1.02(5)
N5 N6 1.426(6)
N5 HN5a 0.94(5)
N5 HN5b 0.89(6)
N5 HN5c 0.89(6)
N2 HN2a 0.79(6)
N2 HN2b 0.82(7)
N4 HN4b 0.88(6)
N4 HN4a 0.76(5)
N7 N7b 1.462(8)
N7 HN7a 0.90(7)
N7 HN7b 1.05(8)
N6 HN6a 0.83(7)
N6 HN6b 0.89(7)
HN4b HN4a 1.30(7)
HN7a HN7b 1.45(11)
HN1a HN1b 1.58(7)
HN1a HN1c 1.50(9)
HN5a HN5b 1.44(8)
HN5a HN5c 1.35(8)
HN5b HN5c 1.58(9)
HN3a HN3b 1.56(7)
HN6a HN6b 1.30(9)
HN1b HN1c 1.44(8)
HN2a HN2b 1.37(9)

loop_
_geom_angle_atom_site_label_1
_geom_angle_atom_site_label_2
_geom_angle_atom_site_label_3
_geom_angle
Sn1a Sn1 Se1 121.758(14)
Sn1a Sn1 Se2 47.767(10)
Sn1a Sn1 Se2a 47.825(10)
Sn1a Sn1 Se3 121.879(14)
Se1 Sn1 Se2 110.635(15)
Se1 Sn1 Se2a 110.777(16)
Se1 Sn1 Se3 116.360(16)
Se2 Sn1 Se2a 95.592(13)
Se2 Sn1 Se3 110.403(16)
Se2a Sn1 Se3 111.158(17)
Sn1 Se2 Sn1a 84.409(13)
N2 N1 HN1a 112(3)
N2 N1 HN1b 108(3)
N2 N1 HN1c 111(4)
N2 N1 HN2b 27.4(20)
HN1a N1 HN1b 115(4)
HN1a N1 HN1c 104(5)
HN1a N1 HN2b 101(4)
HN1b N1 HN1c 104(5)
HN1b N1 HN2b 92(3)
HN1c N1 HN2b 138(4)
N4 N3 HN4a 23.6(16)
N4 N3 HN3a 116(3)
N4 N3 HN3b 98.5(24)
HN4a N3 HN3a 95(3)
HN4a N3 HN3b 98(3)
HN3a N3 HN3b 110(4)
N6 N5 HN5a 114(3)
N6 N5 HN5b 108(4)
N6 N5 HN5c 109(4)
HN5a N5 HN5b 104(5)
HN5a N5 HN5c 94(5)
HN5b N5 HN5c 124(5)
N1 N2 HN2a 109(4)
N1 N2 HN2b 99(4)
HN2a N2 HN2b 116(6)
N3 N4 HN4b 113(3)
N3 N4 HN4a 107(4)
HN4b N4 HN4a 104(5)
N7b N7 HN7a 107(4)
N7b N7 HN7b 99(4)
HN7a N7 HN7b 95(6)
N5 N6 HN6a 107(4)
N5 N6 HN6b 109(4)
HN6a N6 HN6b 98(6)
N4 HN4b HN4a 34(3)
N7 HN7a HN7b 46(4)
N3 HN4a N4 48(3)
N3 HN4a HN4b 75(3)
N4 HN4a HN4b 40(3)
N1 HN1a HN1b 30.9(24)
N1 HN1a HN1c 36(3)
HN1b HN1a HN1c 55(3)
N5 HN5a HN5b 36(3)
N5 HN5a HN5c 41(3)
HN5b HN5a HN5c 69(4)
N5 HN5b HN5a 38(3)
N5 HN5b HN5c 27(3)
HN5a HN5b HN5c 52(4)
N3 HN3a HN3b 37(3)
N3 HN3b HN3a 31.5(22)
N6 HN6a HN6b 42(4)
N1 HN1b HN1a 34(3)
N1 HN1b HN1c 38(3)
HN1a HN1b HN1c 59(4)
N2 HN2a HN2b 32(4)
N1 HN1c HN1a 38(3)
N1 HN1c HN1b 36(3)
HN1a HN1c HN1b 64(4)
N7 HN7b HN7a 38(4)
N5 HN5c HN5a 43(3)
N5 HN5c HN5b 27(3)
HN5a HN5c HN5b 58(4)
N1 HN2b N2 53(4)
N1 HN2b HN2a 71(4)
N2 HN2b HN2a 31(3)
N6 HN6b HN6a 39(4)

#===============================================================================
# Additional structures (sections 5-10 and associated data_? identifiers)
# may be added at this point.
#===============================================================================

#===END

#===============================================================================
data_hydgese
#===============================================================================

# 5. CHEMICAL DATA

_chemical_name_systematic        "'hydrazinium germanium(IV) selenide'"
_chemical_name_common            "'hydrazinium germanium(IV) selenide'"
_chemical_formula_moiety         'N8 H20 Ge2 Se6'
_chemical_formula_structural     ?
_chemical_formula_analytical     ?
_chemical_formula_sum            'N8 H20 Ge2 Se6'
_chemical_formula_weight         751.14
_chemical_compound_source        ?

loop_
_atom_type_symbol
_atom_type_description
_atom_type_scat_dispersion_real
_atom_type_scat_dispersion_imag
_atom_type_scat_source
N ? 0.006 0.003 'International Tables Vol. IV Table 2.2B'
H ? 0.000 0.000 'International Tables Vol. IV Table 2.2B'
Ge ? 0.155 1.800 'International Tables Vol. IV Table 2.2B'
Se ? -0.093 2.226 'International Tables Vol. IV Table 2.2B'

#===============================================================================

# 6. CRYSTAL DATA

_symmetry_cell_setting           tetragonal
_symmetry_space_group_name_H-M   'I 41 c d'
_symmetry_int_tables_number      110

loop_
_symmetry_equiv_pos_as_xyz

x,y,z
1/2+x,1/2+y,1/2+z
-y,1/2+x,1/4+z
1/2-y,x,3/4+z
1/2-x,1/2-y,1/2+z
-x,-y,z
1/2+y,-x,3/4+z
y,1/2-x,1/4+z
-x,y,1/2+z
1/2-x,1/2+y,z
y,1/2+x,3/4+z
1/2+y,x,1/4+z
1/2+x,1/2-y,z
x,-y,1/2+z
1/2-y,-x,1/4+z
-y,1/2-x,3/4+z
_cell_length_a                   12.7080(12)
_cell_length_b                   12.7080(12)
_cell_length_c                   21.9553(20)
_cell_angle_alpha                90.0
_cell_angle_beta                 90.0
_cell_angle_gamma                90.0
_cell_volume                     3545.6(5)
_cell_formula_units_Z            8
_cell_measurement_temperature    293
_cell_measurement_reflns_used    24
_cell_measurement_theta_min      20.00
_cell_measurement_theta_max      25.00
_cell_special_details            
;
 ?  #Insert any comments here.
;
_exptl_crystal_description       'irregular block'
_exptl_crystal_colour            'pale yellow'
_exptl_crystal_size_max          0.18
_exptl_crystal_size_mid          0.05
_exptl_crystal_size_min          0.03
_exptl_crystal_size_rad          ?
_exptl_crystal_density_meas      ?
_exptl_crystal_density_diffrn    2.814
_exptl_crystal_density_method    'not measured'
_exptl_crystal_F_000             2754.72
_exptl_absorpt_coefficient_mu    15.70
_exptl_absorpt_correction_type   empirical
_exptl_absorpt_process_details   SADABS
_exptl_absorpt_correction_T_min  ?
_exptl_absorpt_correction_T_max  ?

#===============================================================================

# 7. EXPERIMENTAL DATA

_exptl_special_details           
;
A pale yellow block-like crystal of (N2H5)4Ge2Se6 (1), 
with the approximate dimensions 
0.03 mm x 0.05 mm x 0.18 mm, was 
selected under a microscope and attached to the end of a quartz fiber 
with 5 minute epoxy. Intensity data were collected with a Bruker 
SMART CCD diffractometer equipped with a fine focus 2.4 kW 
sealed tube X-ray source (MoKa radiation) and a detector distance 
of approximately 5.0 cm. The data were collected in 2272 frames 
with increasing omega and an exposure time of 60 sec per frame. 
A longer time was used for 1, because of the small size of the crystal. 
The increment in omega between each frame was 0.3 deg. 

Final cell parameters and crystal orientation matrix were obtained by a 
least-squares fit of 4526 reflections. An empirical absorption 
correction based on equivalent reflections was applied to the intensity data. 
The structure was solved and refined using the NRCVAX 386 PC version 
program.  First, the Ge and Se atoms were located using direct methods. 
The N atoms were then located using successive Fourier difference maps.
All heavy atoms (Ge, Se, N) were refined anisotropically.  Hydrogen 
atoms were located from difference maps and fully refined using isotropic 
thermal parameters.  The minimum and maximum peaks in the final difference 
Fourier map correspond to --0.4 and 0.5 e/A3.  
No additional symmetry was detected for the refined structures using the 
MISSYM program.
;

_diffrn_ambient_temperature      293
_diffrn_radiation_probe          x-ray
_diffrn_radiation_type           'Molybdenum K\a'
_diffrn_radiation_wavelength     0.70930
_diffrn_source                   'xray tube'
_diffrn_source_type              'Bruker SMART 1000'

_diffrn_measurement_device       'SMART 1000'
_diffrn_measurement_method       CCD
_diffrn_standards_number         ?
_diffrn_standards_interval_count ?
_diffrn_standards_interval_time  ?
_diffrn_standards_decay_%        ?
loop_
_diffrn_standard_refln_index_h
_diffrn_standard_refln_index_k
_diffrn_standard_refln_index_l
? ? ?

_diffrn_reflns_number            17454
_diffrn_reflns_av_R_equivalents  0.025
_diffrn_reflns_av_sigmaI/netI    ?
_diffrn_reflns_limit_h_min       -3
_diffrn_reflns_limit_h_max       16
_diffrn_reflns_limit_k_min       -3
_diffrn_reflns_limit_k_max       11
_diffrn_reflns_limit_l_min       0
_diffrn_reflns_limit_l_max       28
_diffrn_reflns_theta_min         0.00
_diffrn_reflns_theta_max         27.44
_diffrn_reflns_reduction_process ?

_reflns_number_total             2031
_reflns_number_observed          1726
_reflns_observed_criterion       'Inet > 2.0\s(Inet)'

_computing_data_collection       ?
_computing_cell_refinement       ?
_computing_data_reduction        'NRCVAX DATRD2'
_computing_structure_solution    'NRCVAX SOLVER'
_computing_structure_refinement  'NRCVAX LSTSQ'
_computing_molecular_graphics    NRCVAX
_computing_publication_material  'NRCVAX TABLES Jan 94 Version'

#===============================================================================

# 8. REFINEMENT DATA

_refine_special_details          
;
 ?  #Insert any special details here.
;

_refine_ls_structure_factor_coef F
_refine_ls_matrix_type           full
_refine_ls_weighting_scheme      calc
_refine_ls_weighting_details     'calc w=1/(\s^2^(F)+0.0003F^2^)'
_refine_ls_hydrogen_treatment    ?
_refine_ls_extinction_method     Larson
_refine_ls_extinction_coef       922(137)
_refine_ls_abs_structure_details ?
_refine_ls_abs_structure_Flack   -.016(83)
_refine_ls_number_reflns         880
_refine_ls_number_parameters     115
_refine_ls_number_restraints     ?
_refine_ls_number_constraints    ?
_refine_ls_R_factor_all          0.019
_refine_ls_R_factor_obs          0.019
_refine_ls_wR_factor_all         0.027
_refine_ls_wR_factor_obs         0.027
_refine_ls_goodness_of_fit_all   ?
_refine_ls_goodness_of_fit_obs   0.98
_refine_ls_restrained_S_all      ?
_refine_ls_restrained_S_obs      ?
_refine_ls_shift/esd_max         0.000
_refine_ls_shift/esd_mean        ?
_refine_diff_density_max         0.53
_refine_diff_density_min         -0.39

#===============================================================================

# 9. ATOMIC COORDINATES AND THERMAL PARAMETERS

loop_
_atom_site_label
_atom_site_fract_x
_atom_site_fract_y
_atom_site_fract_z
_atom_site_U_iso_or_equiv
_atom_site_thermal_displace_type
_atom_site_calc_flag
_atom_site_refinement_flags
_atom_site_type_symbol
Se1 0.35986(4) 0.00673(5) 0.13547 0.0263(5) Uani . . Se
Se2 0.49018(8) -0.15314(11) 0.00474(13) 0.0330(6) Uani . . Se
Ge1 0.50000 0.00000 0.20966(22) 0.0236(11) Uani . S Ge
Se3 0.50708(7) 0.15495(13) 0.26500(13) 0.0345(7) Uani . . Se
Ge2 0.50000 0.00000 0.06067(21) 0.0239(12) Uani . S Ge
N1 0.3919(4) 0.7259(4) 0.1332(7) 0.040(3) Uani . . N
N3 0.8493(4) 0.2061(5) 0.1356(7) 0.047(4) Uani . . N
N2 0.4430(5) 0.6242(4) 0.1372(6) 0.038(3) Uani . . N
N4 0.8055(5) 0.2306(6) 0.0772(5) 0.044(4) Uani . . N
H1 0.727(7) 0.269(7) 0.086(4) 0.07(3) Uiso . . H
H2 0.415(8) 0.581(8) 0.167(5) 0.09(3) Uiso . . H
H3 0.804(9) 0.154(9) 0.151(6) 0.16(5) Uiso . . H
H4 0.421(7) 0.587(7) 0.105(4) 0.07(3) Uiso . . H
H5 0.394(8) 0.753(7) 0.166(4) 0.08(4) Uiso . . H
H6 0.856(6) 0.274(7) 0.152(4) 0.07(3) Uiso . . H
H7 0.851(7) 0.272(8) 0.062(4) 0.07(3) Uiso . . H
H8 0.431(6) 0.760(5) 0.099(3) 0.054(22) Uiso . . H
H9 0.800(5) 0.177(6) 0.060(3) 0.040(22) Uiso . . H
H10 0.526(11) 0.646(11) 0.161(7) 0.18(7) Uiso . . H

loop_
_atom_site_aniso_label
_atom_site_aniso_U_11
_atom_site_aniso_U_22
_atom_site_aniso_U_33
_atom_site_aniso_U_12
_atom_site_aniso_U_13
_atom_site_aniso_U_23
_atom_site_aniso_type_symbol
Se1 0.02346(23) 0.0315(3) 0.0240(3) 0.00061(19) 0.0011(8) 0.0014(7) Se
Se2 0.0446(6) 0.0294(6) 0.0252(7) -0.0006(3) -0.0020(10) -0.0046(6) Se
Ge1 0.0263(11) 0.0235(11) 0.0212(13) 0.0016(3) 0.00000 0.00000 Ge
Se3 0.0423(7) 0.0323(7) 0.0287(8) 0.0018(3) 0.0003(8) -0.0098(6) Se
Ge2 0.0321(12) 0.0257(11) 0.0139(12) 0.0000(3) 0.00000 0.00000 Ge
N1 0.038(3) 0.036(3) 0.047(4) 0.0018(22) -0.002(5) -0.002(4) N
N3 0.046(3) 0.043(3) 0.053(4) -0.0045(25) 0.011(6) 0.002(4) N
N2 0.044(3) 0.034(3) 0.037(3) -0.0005(23) -0.006(4) 0.004(3) N
N4 0.041(4) 0.032(3) 0.059(4) -0.003(3) 0.003(3) -0.002(3) N

#===============================================================================

# 10. MOLECULAR GEOMETRY

loop_
_geom_bond_atom_site_label_1
_geom_bond_atom_site_label_2
_geom_bond_distance

Se1 Ge1 2.415(3)
Se1 Ge2 2.424(3)
Se2 Ge2 2.305(3)
Ge1 Se1a 2.415(3)
Ge1 Se3 2.316(3)
Ge1 Se3a 2.316(3)
Ge2 Se1a 2.424(3)
Ge2 Se2a 2.305(3)
N1 N2 1.450(7)
N1 H5 0.80(9)
N1 H8 1.01(8)
N3 N4 1.433(17)
N3 H3 0.94(13)
N3 H6 0.94(9)
N2 H2 0.93(11)
N2 H4 0.90(9)
N2 H10 1.21(13)
N4 H1 1.12(9)
N4 H7 0.85(10)
N4 H9 0.79(7)

loop_
_geom_contact_atom_site_label_1
_geom_contact_atom_site_label_2
_geom_contact_distance
_geom_contact_site_symmetry_1
_geom_contact_site_symmetry_2
_geom_contact_publ_flag
? ? ? ? ? ?

loop_
_geom_angle_atom_site_label_1
_geom_angle_atom_site_label_2
_geom_angle_atom_site_label_3
_geom_angle

Ge1 Se1 Ge2 85.06(12)
Se1 Ge1 Se1a 95.17(17)
Se1 Ge1 Se3 110.64(5)
Se1 Ge1 Se3a 110.82(5)
Se1a Ge1 Se3 110.82(5)
Se1a Ge1 Se3a 110.64(5)
Se3 Ge1 Se3a 116.71(22)
Se1 Ge2 Se1a 94.71(16)
Se1 Ge2 Se2 110.55(5)
Se1 Ge2 Se2a 111.78(5)
Se1a Ge2 Se2 111.78(5)
Se1a Ge2 Se2a 110.55(5)
Se2 Ge2 Se2a 115.60(21)
N2 N1 H5 108(7)
N2 N1 H8 102(4)
H5 N1 H8 118(8)
N4 N3 H3 103(8)
N4 N3 H6 100(5)
H3 N3 H6 124(9)
N1 N2 H2 113(6)
N1 N2 H4 106(6)
N1 N2 H10 102(7)
H2 N2 H4 97(8)
H2 N2 H10 99(9)
H4 N2 H10 137(9)
N3 N4 H1 105(5)
N3 N4 H7 102(6)
N3 N4 H9 106(5)
H1 N4 H7 113(7)
H1 N4 H9 112(7)
H7 N4 H9 114(8)
N2 H2 H4 40(6)
N2 H4 H2 41(6)
N1 H5 H8 34(5)
N4 H7 H9 31(5)
N1 H8 H5 27(4)
N4 H9 H7 34(5)

#===============================================================================
# Additional structures (sections 5-10 and associated data_? identifiers)
# may be added at this point.
#===============================================================================

# The following lines are used to test the character set of files sent by
# network email or other means. They are not part of the CIF data set.
# abcdefghijklmnopqrstuvwxyzABCDEFGHIJKLMNOPQRSTUVWXYZ0123456789
# !@#$%^&*()_+{}:"~<>?|\-=[];,./
